# Supplementary material for: Structural diversities and gas adsorption properties of a family of rod-packing lanthanide–organic frameworks based on cyclotriphosphazene-functionalized hexacarboxylate derivatives
Source: Royal Society of Chemistry journal article supplement (doi:10.1039/c8qi00575c), 2018-01-01
Supplement: c8qi00575c1.pdf [file c8qi00575c1.pdf]

**Structural Diversities and Gas Adsorption Properties of a Family of  
Rod-Packing Lanthanide-Organic Frameworks Based on  
Cyclotriphosphazene-Functionalized Hexacarboxylate Derivatives**

Dongjie Bai, Yao Wang, Minghui He, Xiaoxia Gao and Yabing He\*

Key Laboratory of the Ministry of Education for Advanced Catalysis Materials,  
College of Chemistry and Life Sciences, Zhejiang Normal University, Jinhua 321004,  
China. E-mail: heyabing@zjnu.cn

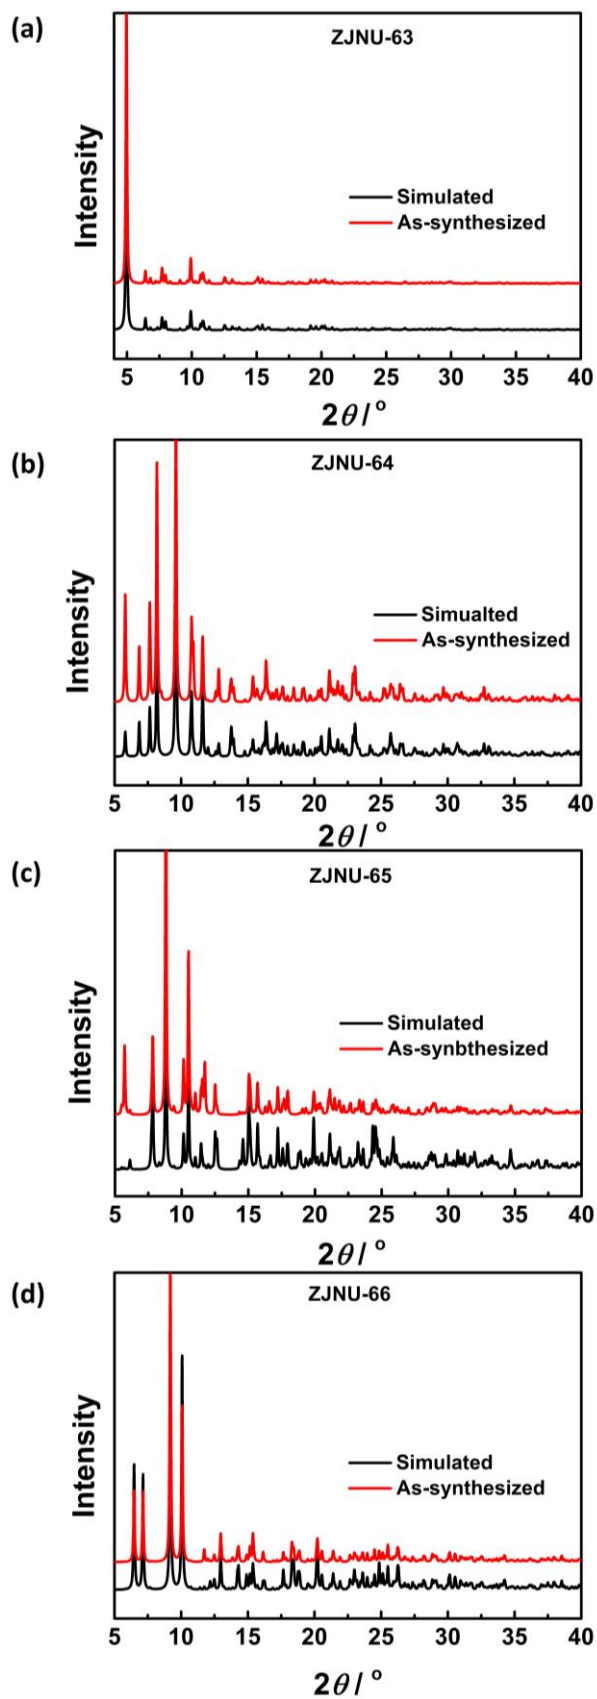

**Fig. S1** The experimental and simulated PXRD patterns for (a) **ZJNU-63**, (b) **ZJNU-64**, (c) **ZJNU-65**, and (d) **ZJNU-66**.

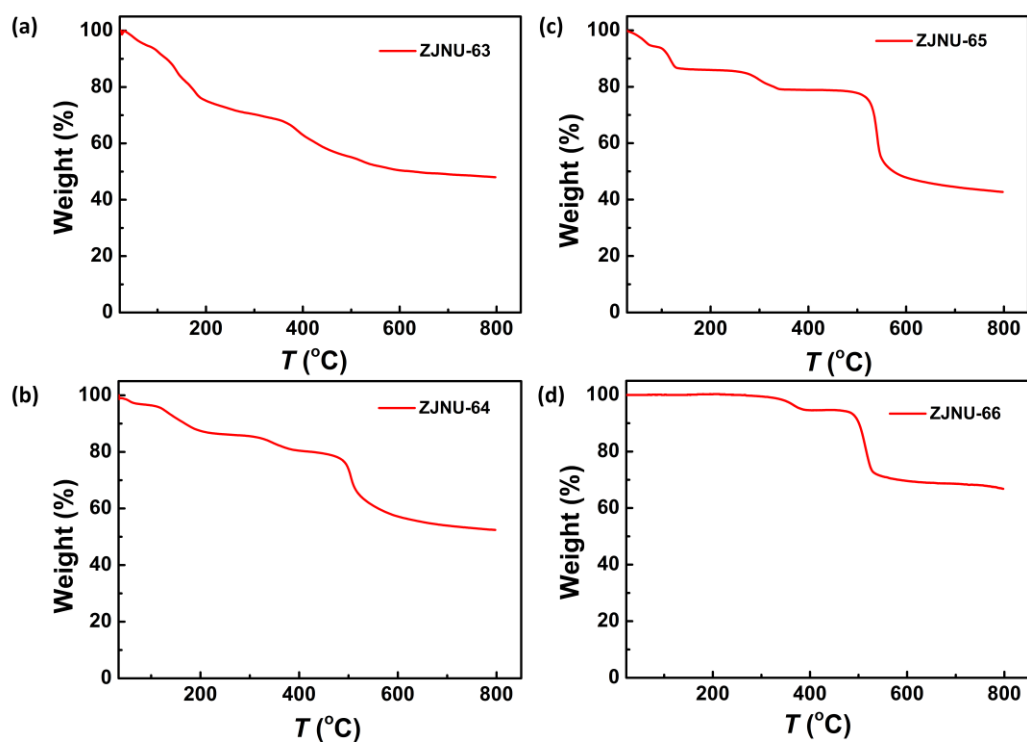

**Fig. S2** TGA curves of the as-synthesized **ZJNU-63**, **ZJNU-64**, **ZJNU-65** and **ZJNU-66** under nitrogen atmosphere.

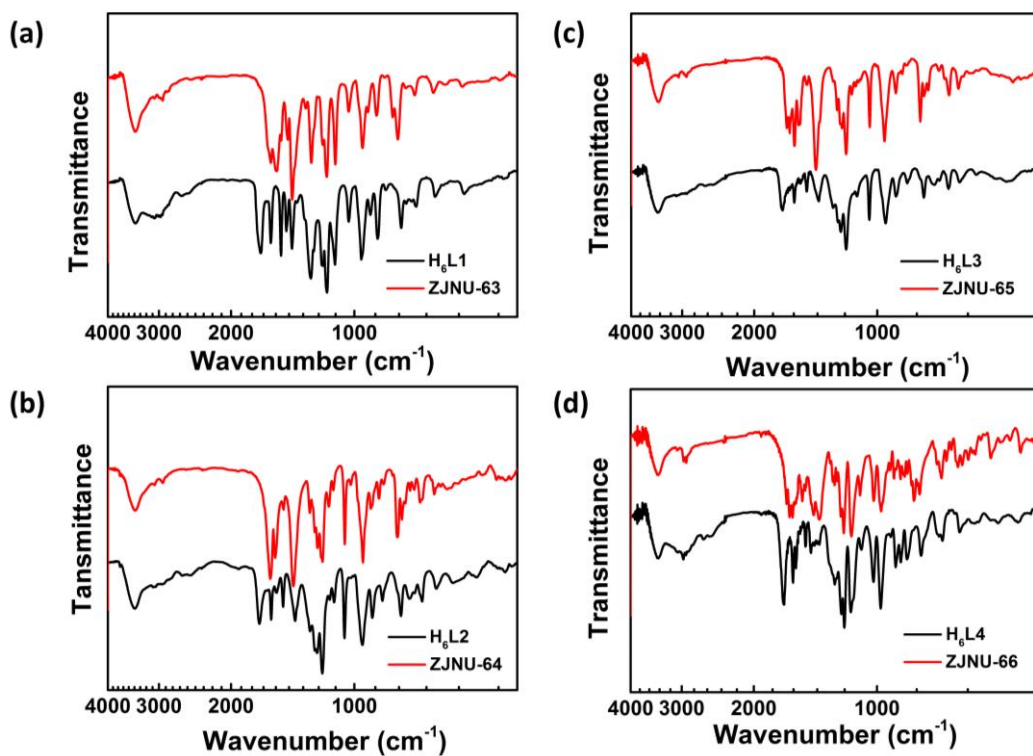

**Fig. S3** Comparison of FTIR spectra of the organic ligands and their corresponding MOFs.

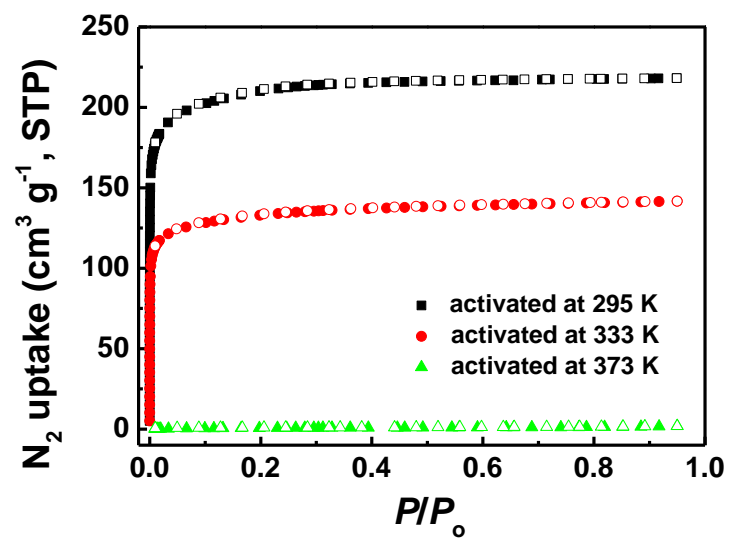

**Fig. S4** Comparison of  $N_2$  isotherms of ZJNU-63, which was activated at different temperatures. The solid and open symbols represent adsorption and desorption, respectively.

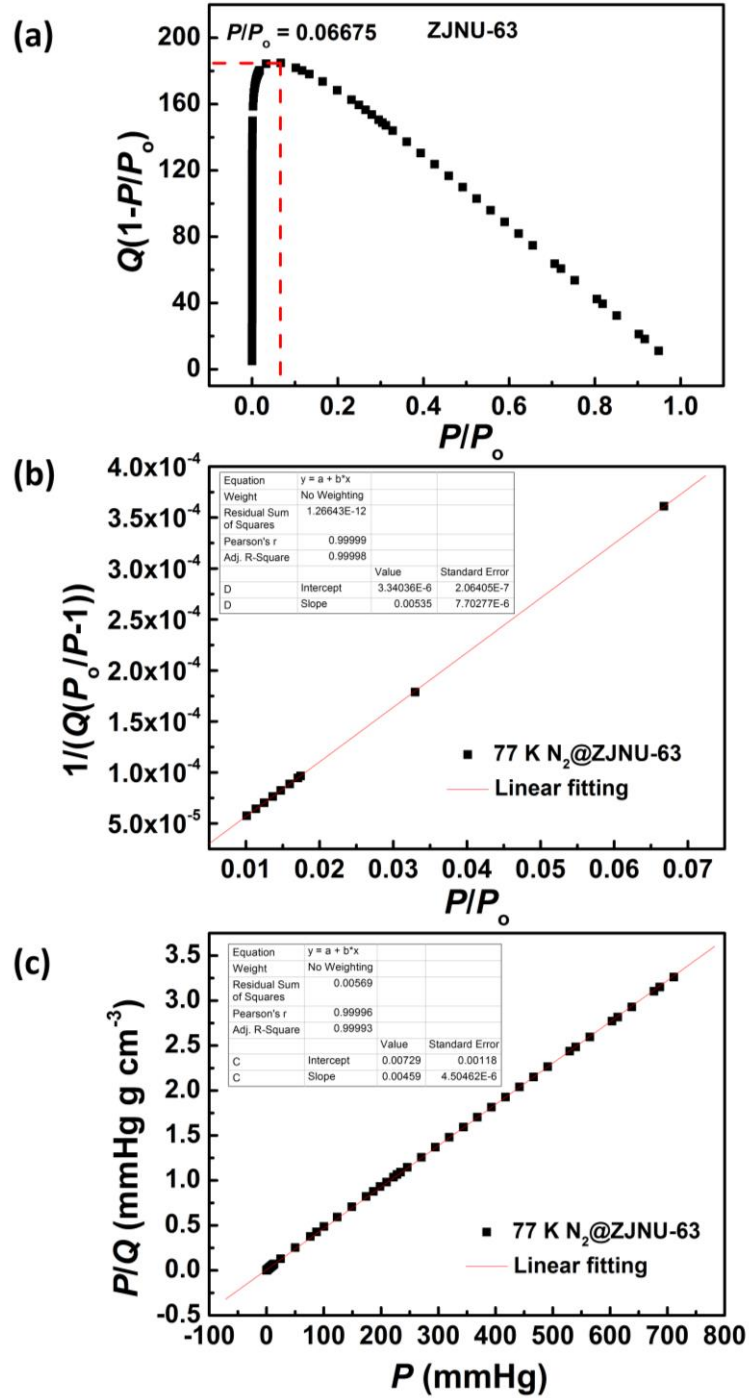

$$S_{\text{BET}} = 1/(3.34036 \times 10^{-6} + 0.00535)/22414 \times 6.023 \times 10^{23} \times 0.162 \times 10^{-18} = 813 \text{ m}^2 \text{ g}^{-1}$$

$$S_{\text{Langmuir}} = (1/0.00459)/22414 \times 6.023 \times 10^{23} \times 0.162 \times 10^{-18} = 948 \text{ m}^2 \text{ g}^{-1}$$

$$\text{BET constant } C = 1 + 0.00535/3.34036 \times 10^{-6} = 1603$$

$$(P/P_o)_{n_m} = \frac{1}{\sqrt{C} + 1} = 0.02437$$

**Fig. S5** The consistency plot (a), BET plot (b) and Langmuir plot (c) for **ZJNU-63**.

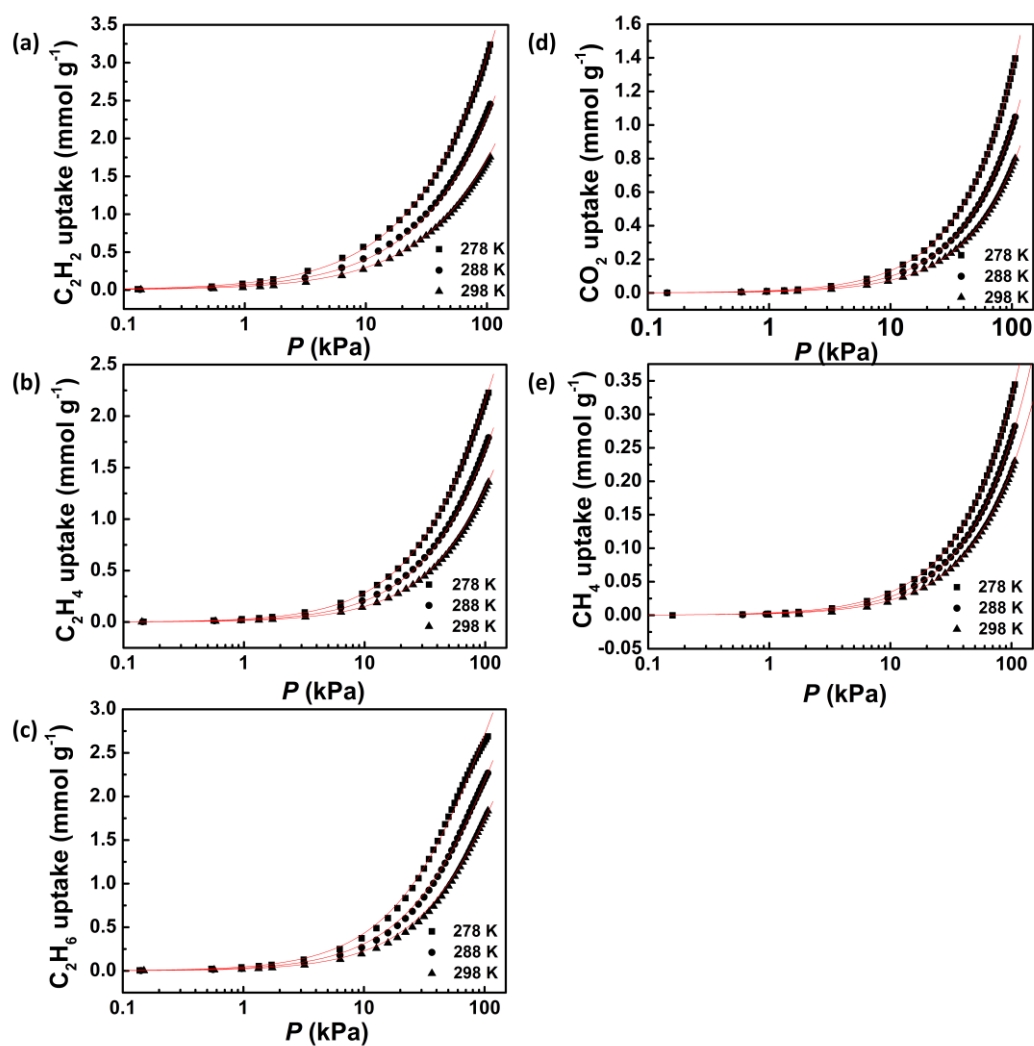

**Fig. S6** Comparison of the pure-component isotherm data for (a)  $C_2H_2$ , (b)  $C_2H_4$ , (c)  $C_2H_6$ , (d)  $CO_2$ , and (e)  $CH_4$  in **ZJNU-63** with the fitted isotherms at 278 K, 288 K and 298 K.

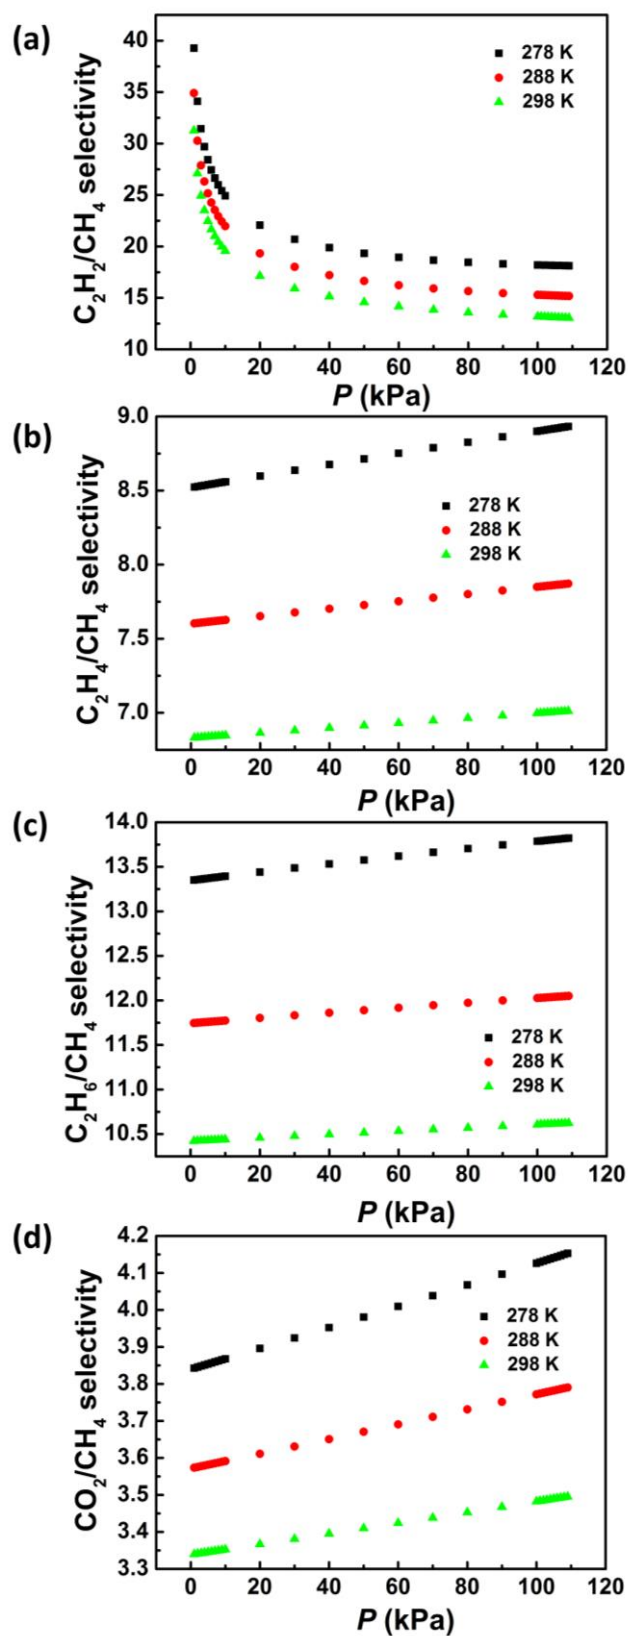

**Fig. S7** IAST selectivities for the equimolar (a)  $C_2H_2/CH_4$ , (b)  $C_2H_4/CH_4$ , (c)  $C_2H_6/CH_4$ , (d)  $CO_2/CH_4$  and (e)  $CO_2/CH_4$  binary gas mixtures in **ZJNU-63** at three different temperatures of 278 K, 288 K, and 298 K.



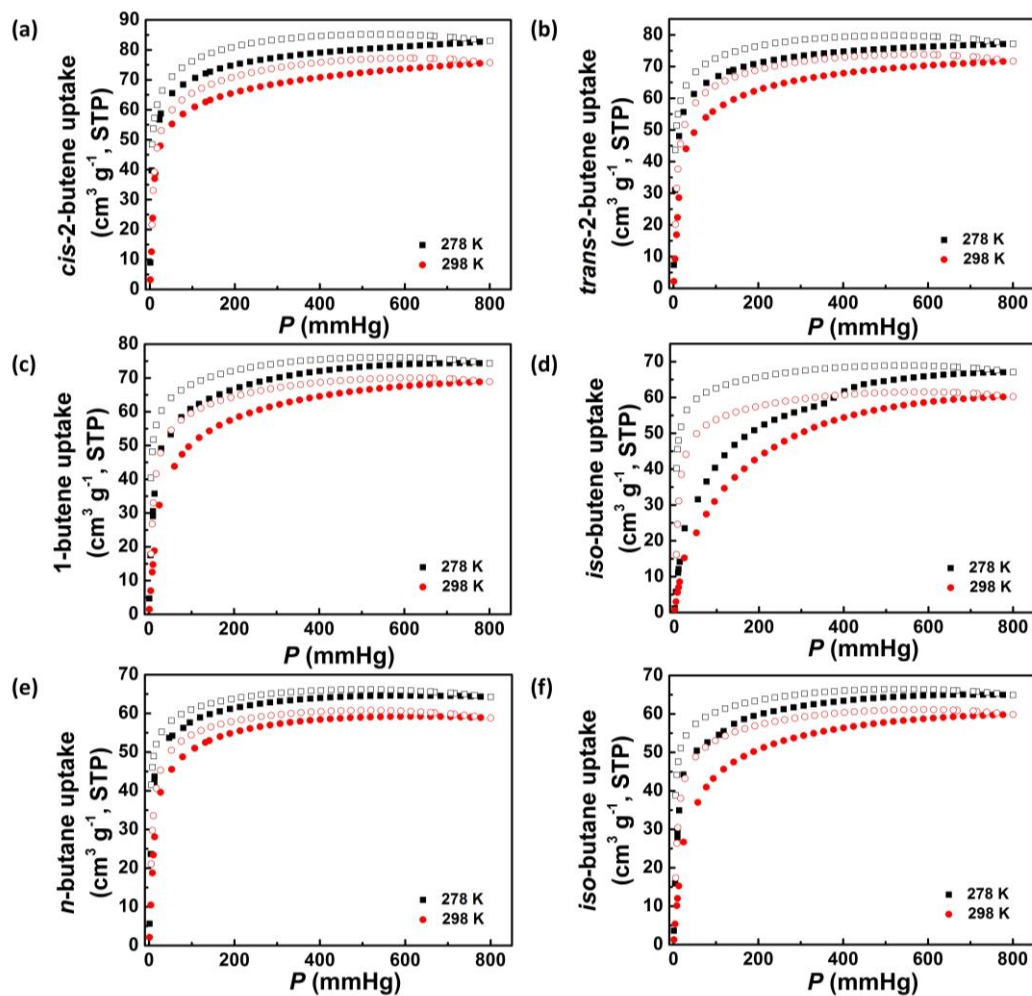

**Fig. S8** (a) *cis*-2-butene, (b) *trans*-2-butene, (c) 1-butene, (d) *iso*-butene, (e) *n*-butane and (f) *iso*-butane isotherms of **ZJNU-63** at two different temperatures of 278 K and 298 K. The solid and open symbols represent adsorption and desorption, respectively. STP = standard temperature and pressure.

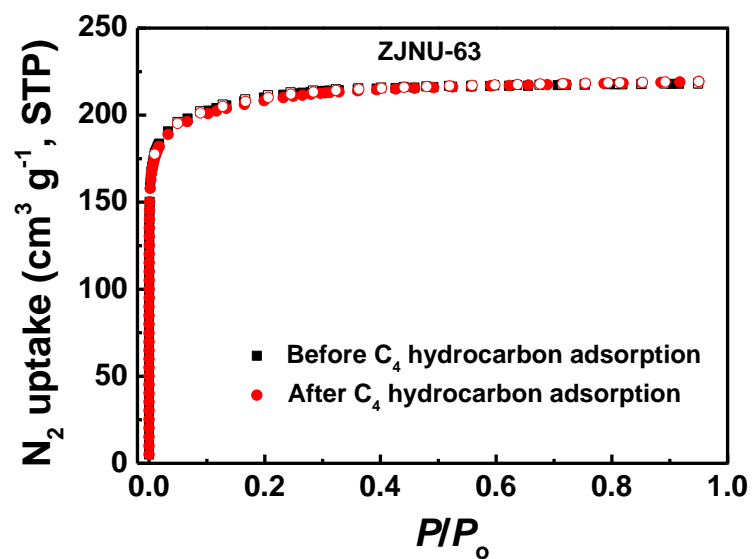

**Fig. S9** N<sub>2</sub> adsorption and desorption isotherms of **ZJNU-63** before and after measurements of all C<sub>4</sub> hydrocarbon isotherms. Solid and open symbols represent adsorption and desorption, respectively. STP = standard temperature and pressure.

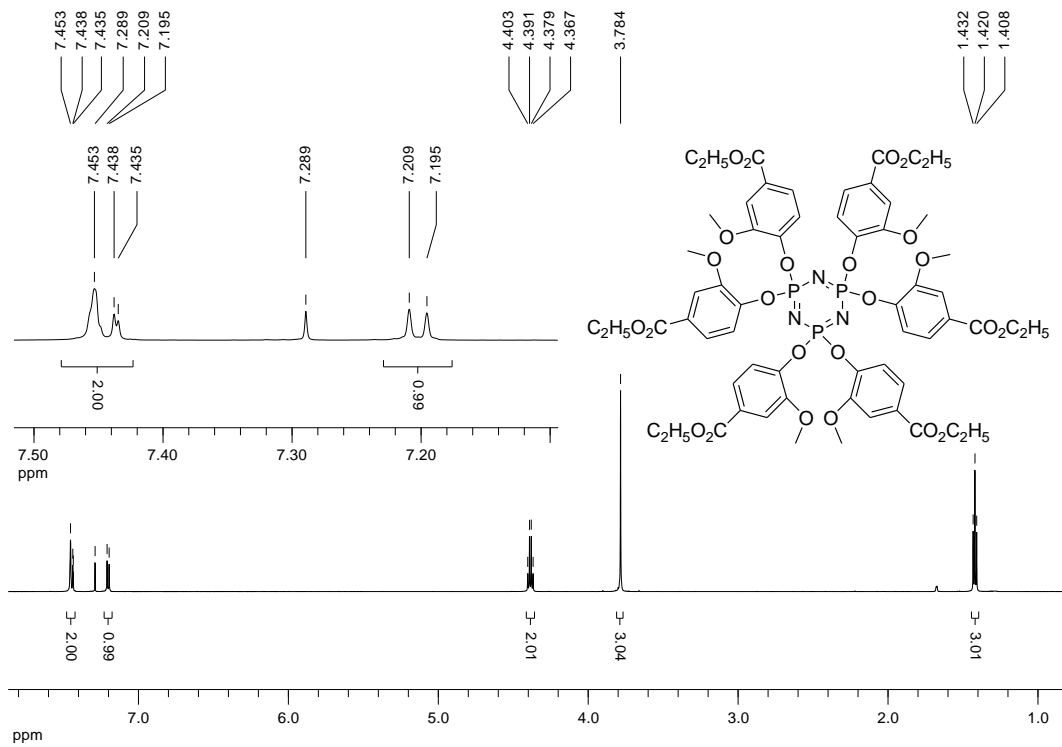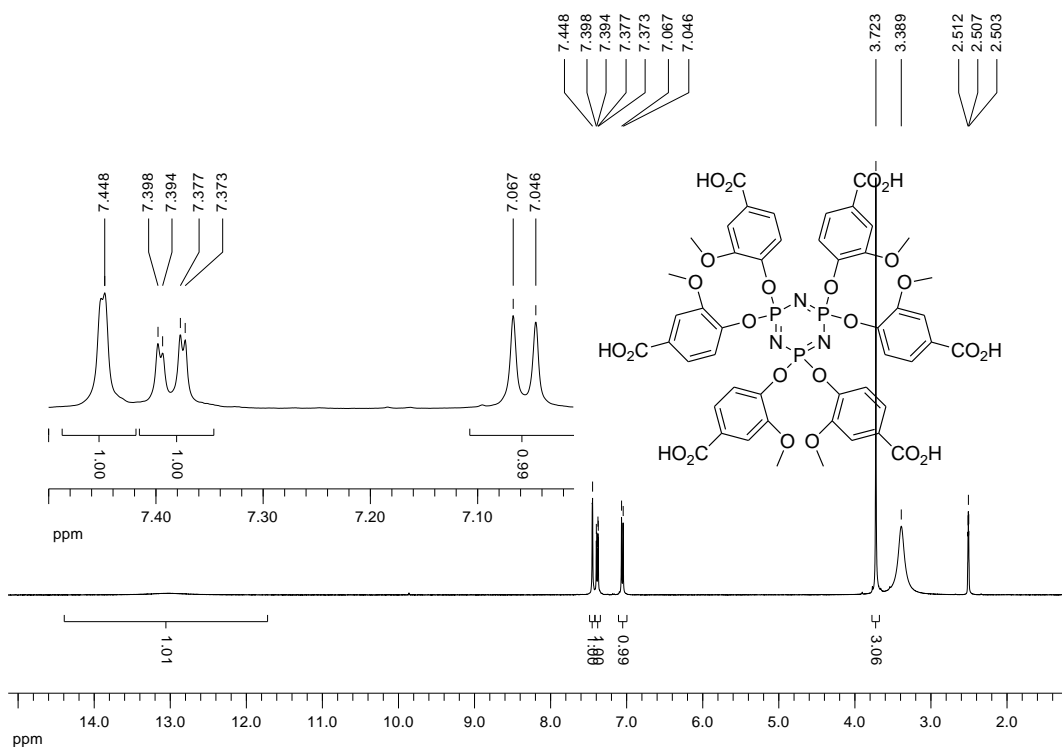

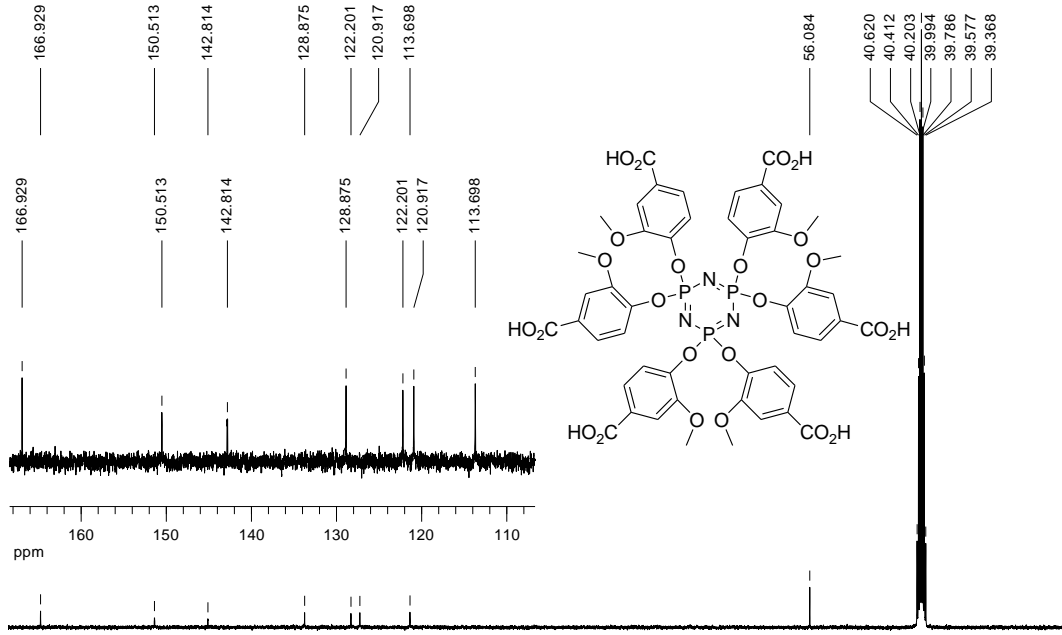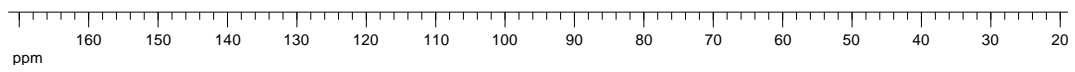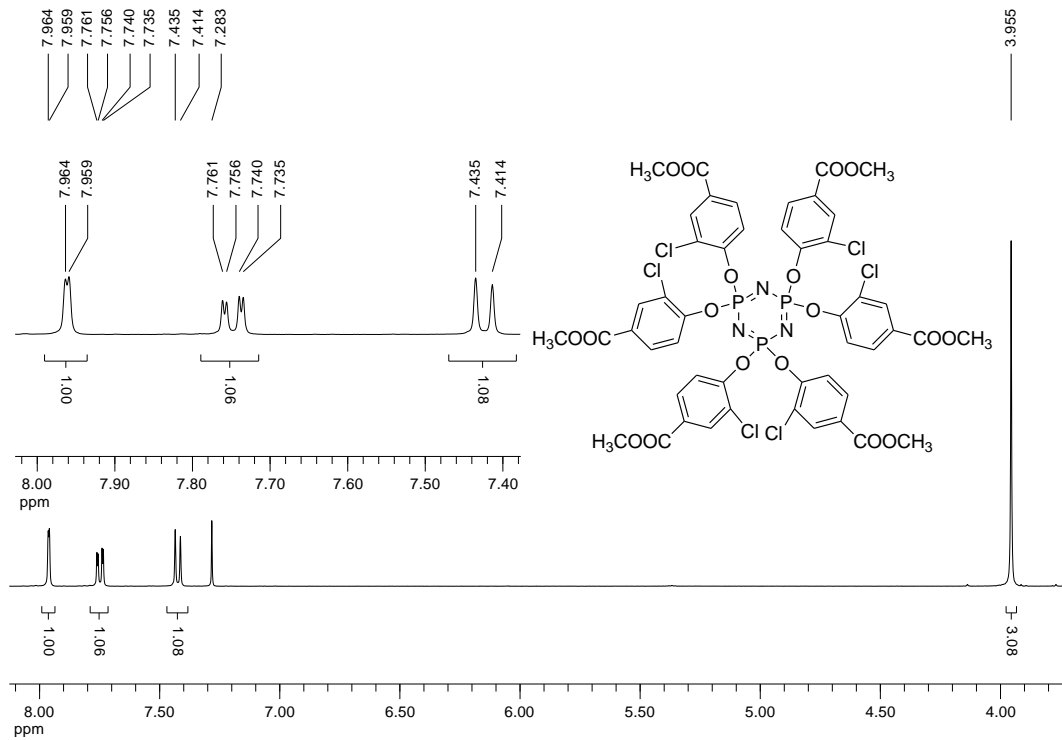

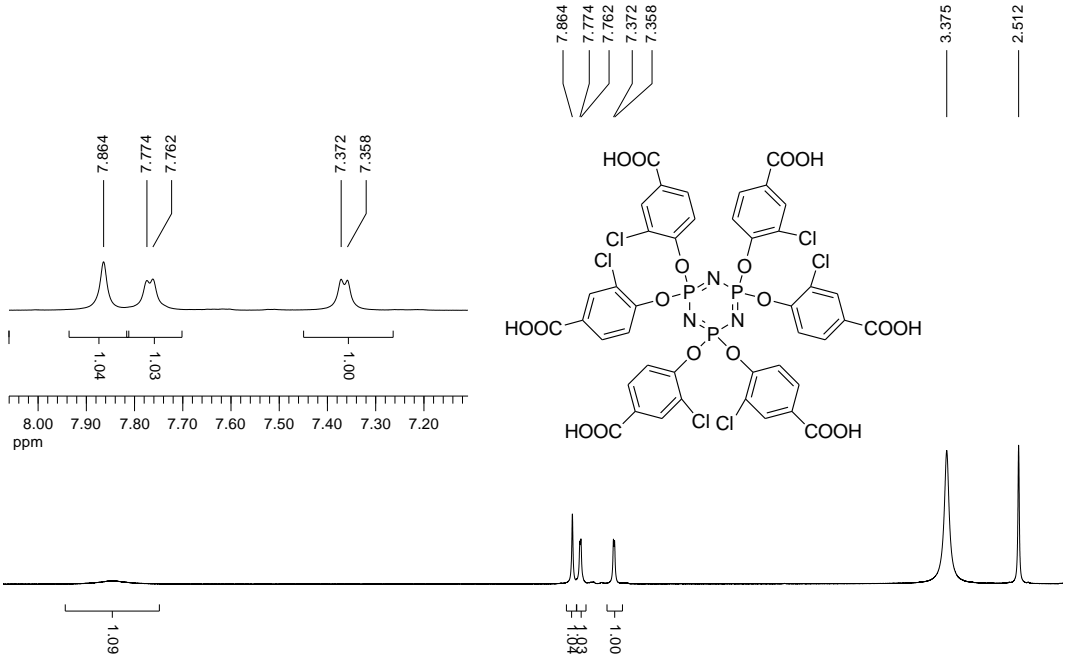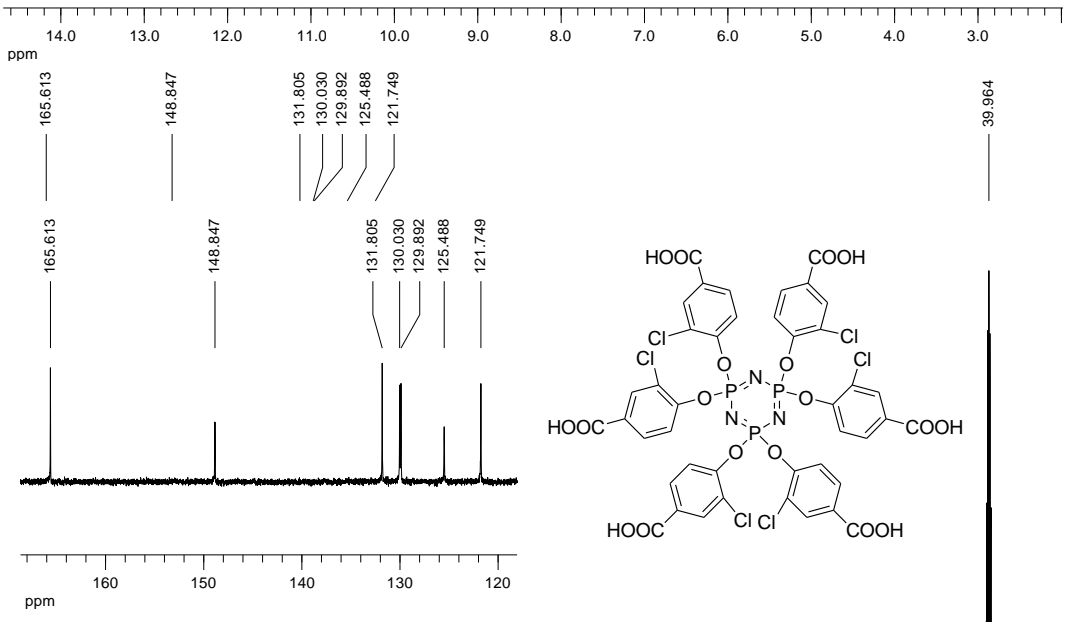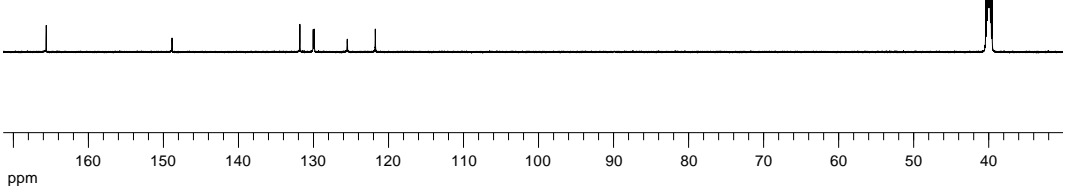

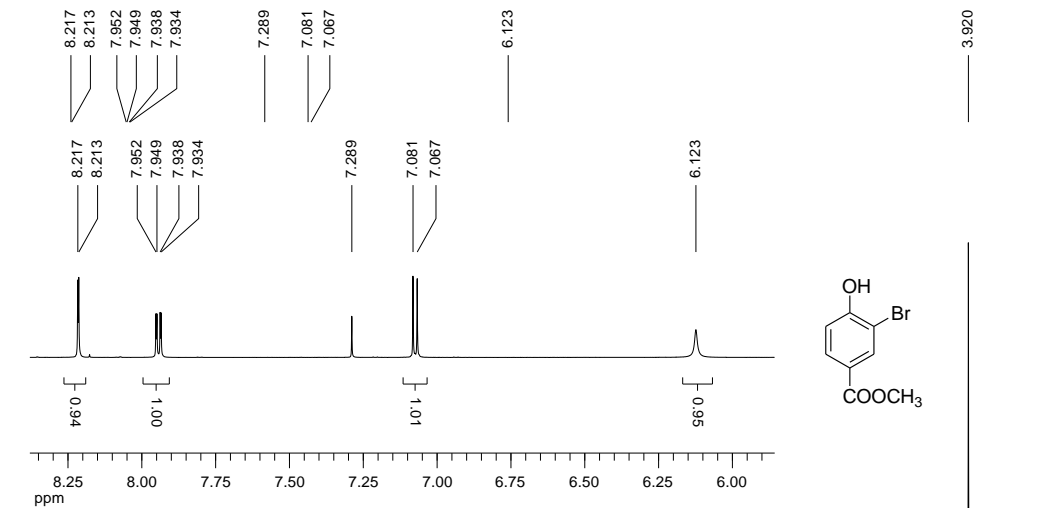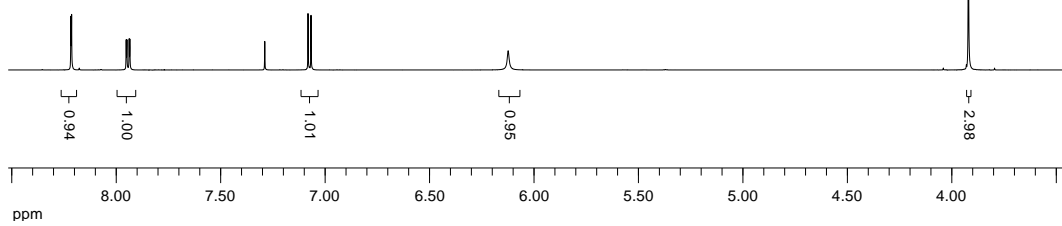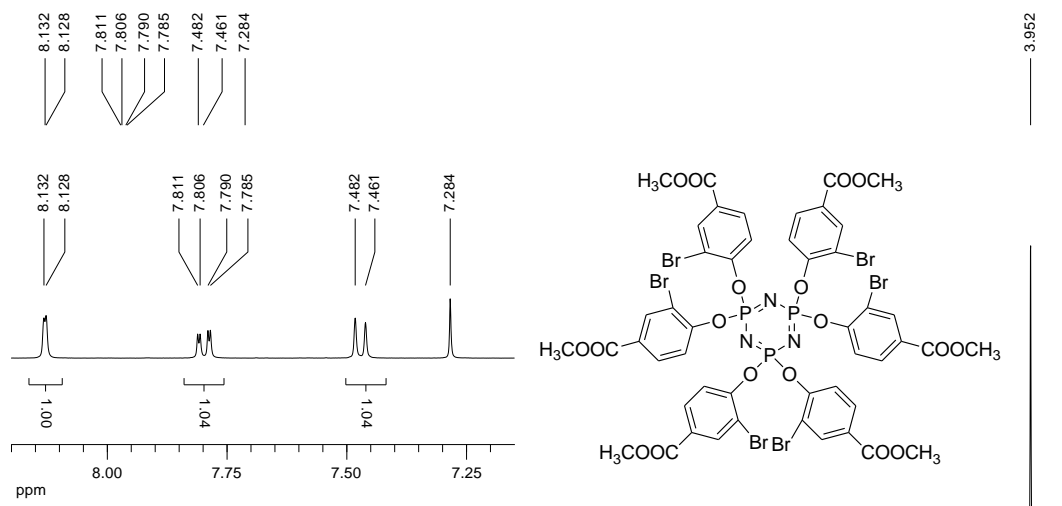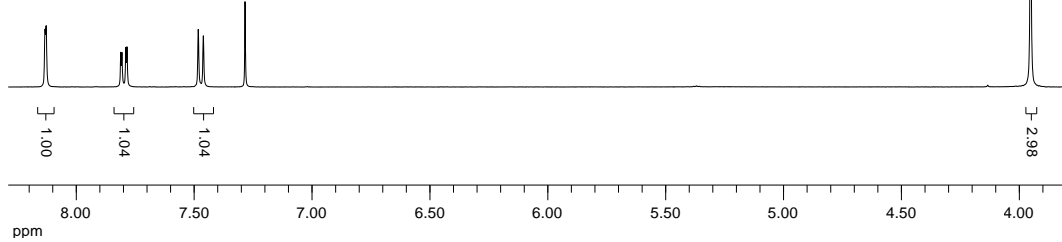

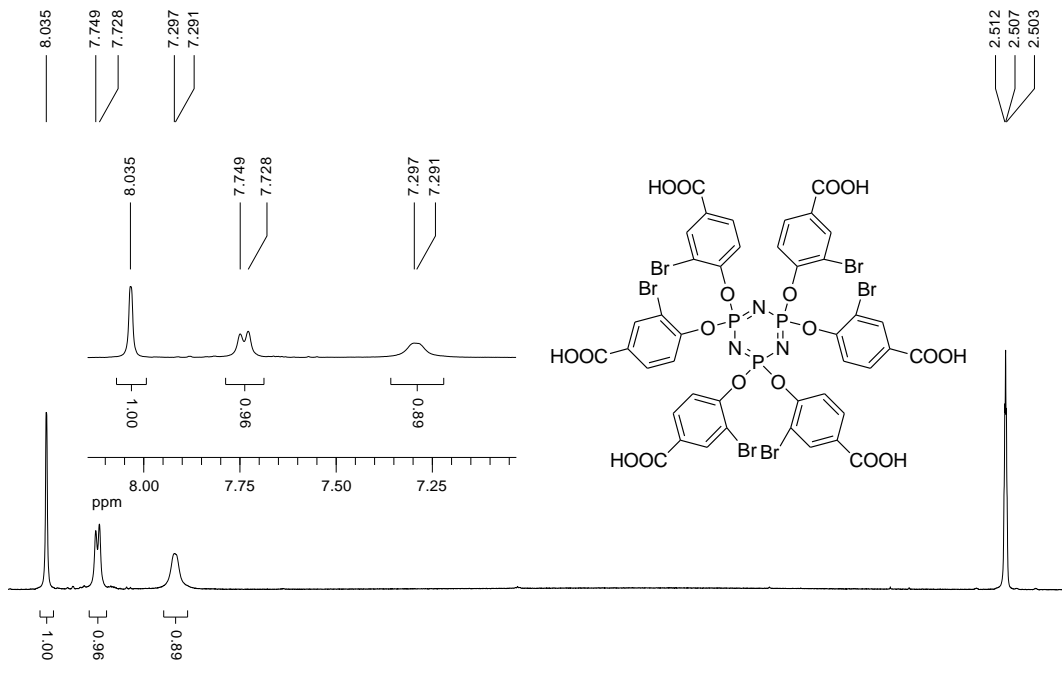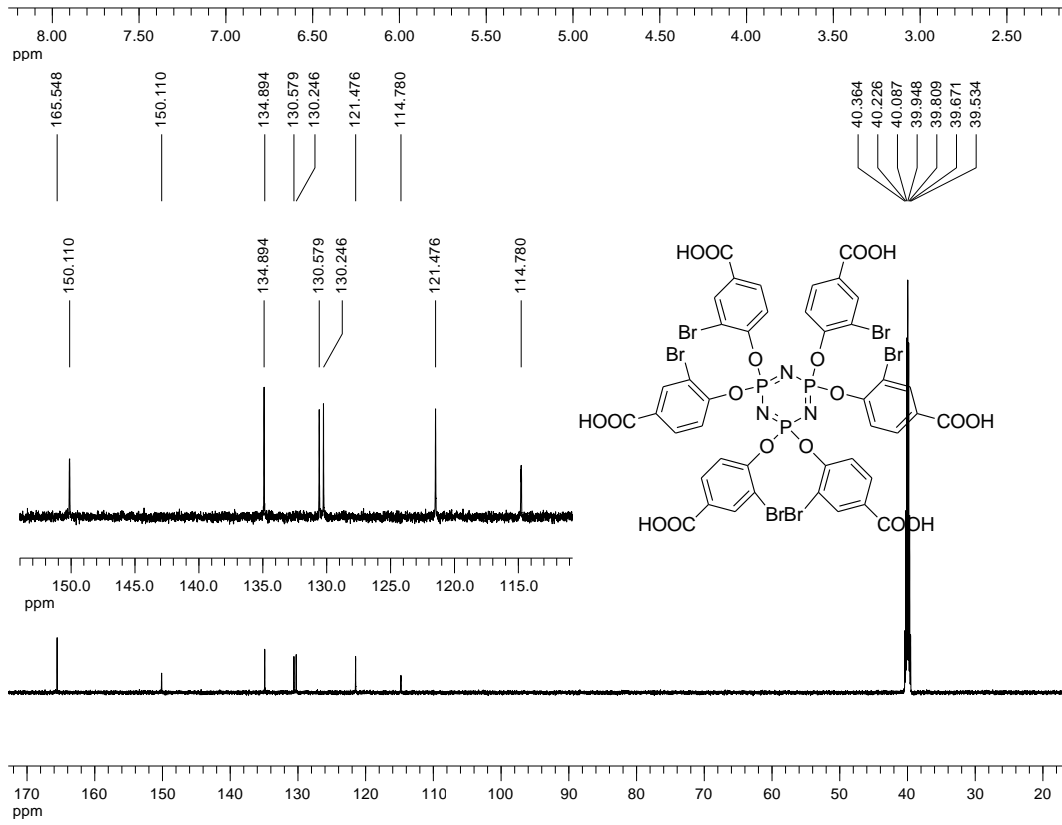

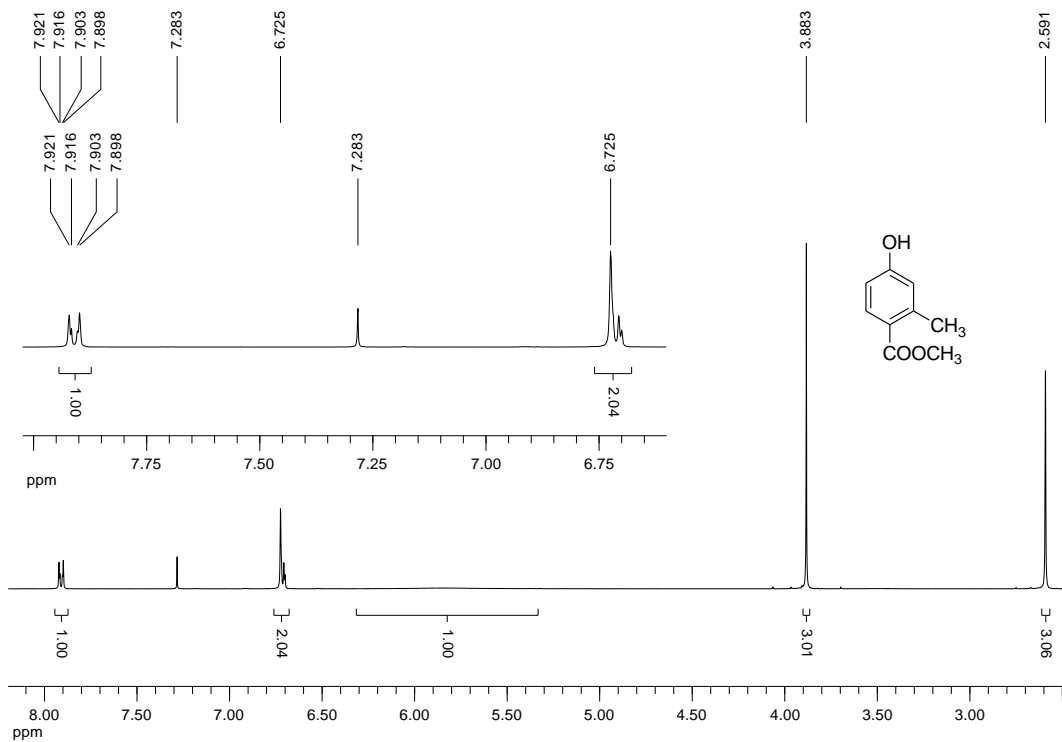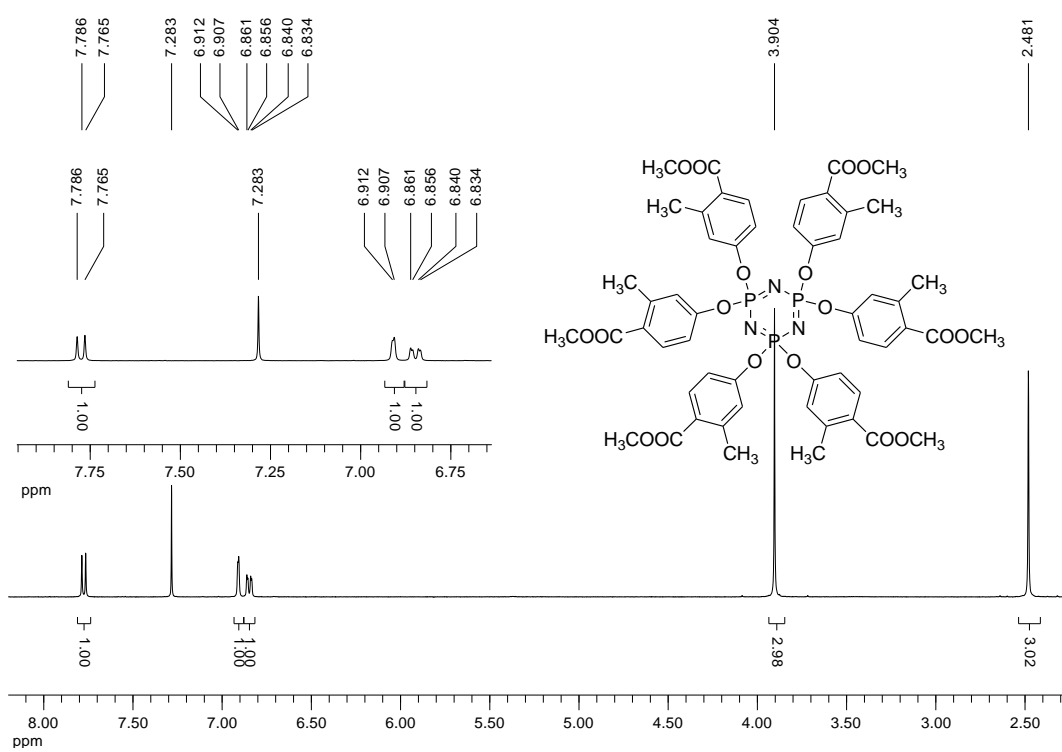



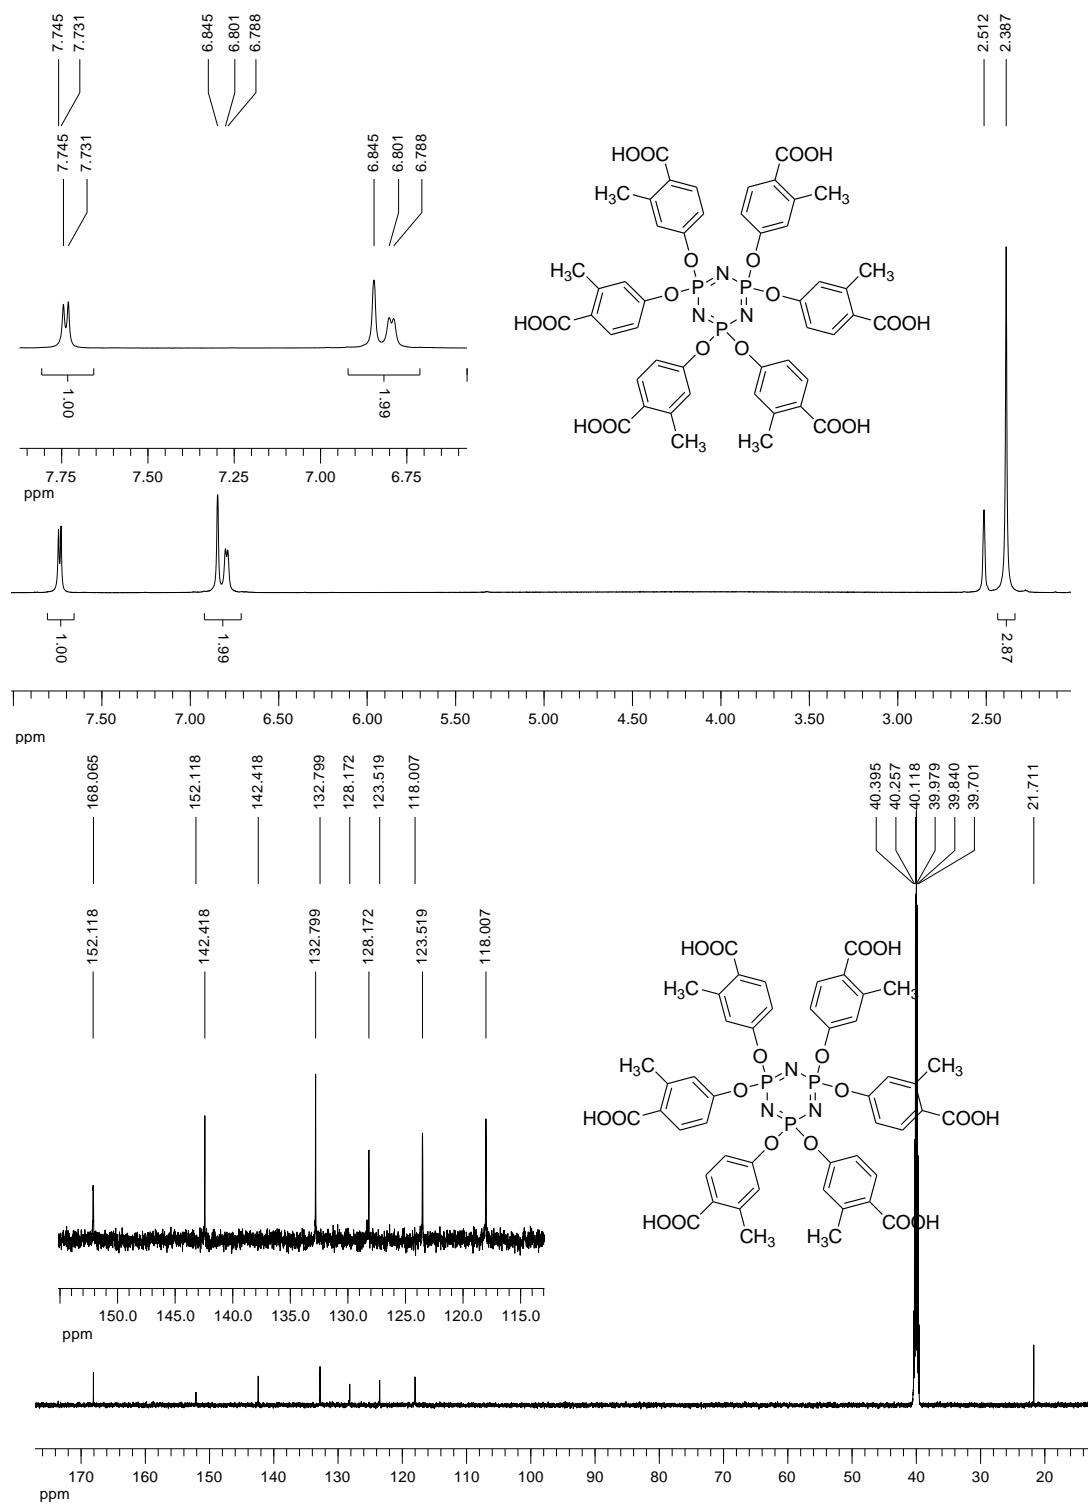

Fig. S8  $^1\text{H}$  and  $^{13}\text{C}$  NMR spectra.

**Table S1** Crystal data and structure refinement for **ZJNU-63**, **ZJNU-64**, **ZJNU-65** and **ZJNU-66**.

| MOFs                                             | ZJNU-63                                                                                                                                    | ZJNU-64                                                                                                                         | ZJNU-65                                                                                                                                                      | ZJNU-66                                                                                                                                 |
|--------------------------------------------------|--------------------------------------------------------------------------------------------------------------------------------------------|---------------------------------------------------------------------------------------------------------------------------------|--------------------------------------------------------------------------------------------------------------------------------------------------------------|-----------------------------------------------------------------------------------------------------------------------------------------|
| Empirical formula                                | C <sub>49</sub> H <sub>39</sub> Ho <sub>2</sub> N <sub>3</sub> O <sub>27</sub> P <sub>3</sub>                                              | C <sub>42</sub> H <sub>22</sub> Cl <sub>6</sub> Ho <sub>2</sub> N <sub>3</sub> O <sub>20</sub> P <sub>3</sub>                   | C <sub>48</sub> H <sub>36</sub> Br <sub>6</sub> Ho <sub>2</sub> N <sub>3</sub> O <sub>22</sub> P <sub>3</sub>                                                | C <sub>51</sub> H <sub>43</sub> Ho <sub>2</sub> N <sub>4</sub> O <sub>19</sub> P <sub>3</sub>                                           |
| Formula weight                                   | 1524.60                                                                                                                                    | 1524.09                                                                                                                         | 1937.05                                                                                                                                                      | 1438.66                                                                                                                                 |
| $\lambda$ (Å)                                    | 0.71073                                                                                                                                    | 0.71073                                                                                                                         | 0.71073                                                                                                                                                      | 0.71073                                                                                                                                 |
| Crystal system                                   | Monoclinic                                                                                                                                 | Orthorhombic                                                                                                                    | Triclinic                                                                                                                                                    | Monoclinic                                                                                                                              |
| Space group                                      | <i>P2<sub>1</sub>/c</i>                                                                                                                    | <i>Pccn</i>                                                                                                                     | <i>P-1</i>                                                                                                                                                   | <i>C2/c</i>                                                                                                                             |
| Unit cell dimensions                             | $a = 14.0524(4)$ Å<br>$b = 24.5135(7)$ Å<br>$c = 26.5196(8)$ Å<br>$\alpha = 90^\circ$<br>$\beta = 101.943(2)^\circ$<br>$\gamma = 90^\circ$ | $a = 30.427(6)$ Å<br>$b = 18.048(4)$ Å<br>$c = 23.107(4)$ Å<br>$\alpha = 90^\circ$<br>$\beta = 90^\circ$<br>$\gamma = 90^\circ$ | $a = 12.3748(9)$ Å<br>$b = 17.8829(11)$ Å<br>$c = 18.3320(12)$ Å<br>$\alpha = 105.840(3)^\circ$<br>$\beta = 106.771(3)^\circ$<br>$\gamma = 109.139(3)^\circ$ | $a = 54.516(6)$ Å<br>$b = 7.8411(8)$ Å<br>$c = 27.411(3)$ Å<br>$\alpha = 90^\circ$<br>$\beta = 114.783(5)^\circ$<br>$\gamma = 90^\circ$ |
| $V$ (Å <sup>3</sup> )                            | 8937.6(5)                                                                                                                                  | 12689(4)                                                                                                                        | 3353.0(4)                                                                                                                                                    | 10638(2)                                                                                                                                |
| $Z$                                              | 4                                                                                                                                          | 8                                                                                                                               | 2                                                                                                                                                            | 8                                                                                                                                       |
| $D_c$ (g cm <sup>-3</sup> )                      | 1.133                                                                                                                                      | 1.596                                                                                                                           | 1.919                                                                                                                                                        | 1.797                                                                                                                                   |
| $\mu$ (mm <sup>-1</sup> )                        | 1.869                                                                                                                                      | 2.869                                                                                                                           | 6.061                                                                                                                                                        | 3.124                                                                                                                                   |
| $F(000)$                                         | 2996                                                                                                                                       | 5888                                                                                                                            | 1848                                                                                                                                                         | 5664                                                                                                                                    |
| Crystal size (mm)                                | 0.180×0.120×0.100                                                                                                                          | 0.110×0.090×0.080                                                                                                               | 0.23×0.15×0.12                                                                                                                                               | 0.200×0.150×0.100                                                                                                                       |
| $\theta$ range for data collection (°)           | 1.143 to 27.617                                                                                                                            | 3.162 to 27.525                                                                                                                 | 1.270 to 27.845                                                                                                                                              | 1.492 to 27.614                                                                                                                         |
| Limiting indices                                 | $-18 \leq h \leq 18$<br>$-31 \leq k \leq 31$<br>$-34 \leq l \leq 34$                                                                       | $-39 \leq h \leq 38$<br>$-22 \leq k \leq 23$<br>$-30 \leq l \leq 30$                                                            | $-16 \leq h \leq 16$<br>$-23 \leq k \leq 23$<br>$-24 \leq l \leq 23$                                                                                         | $-70 \leq h \leq 70$<br>$-10 \leq k \leq 10$<br>$-35 \leq l \leq 35$                                                                    |
| Reflections collected / unique                   | 228777 / 20710                                                                                                                             | 86826 / 14560                                                                                                                   | 100728 / 15737                                                                                                                                               | 103761 / 12331                                                                                                                          |
| $R_{int}$                                        | 0.0523                                                                                                                                     | 0.0597                                                                                                                          | 0.0995                                                                                                                                                       | 0.0499                                                                                                                                  |
| Max. and min. transmission                       | 0.830 and 0.764                                                                                                                            | 0.8030 and 0.7432                                                                                                               | 0.483 and 0.349                                                                                                                                              | 0.732 and 0.576                                                                                                                         |
| Refinement method                                | Full-matrix least-squares on $F^2$                                                                                                         | Full-matrix least-squares on $F^2$                                                                                              | Full-matrix least-squares on $F^2$                                                                                                                           | Full-matrix least-squares on $F^2$                                                                                                      |
| Data/restraints/parameters                       | 20710 / 456 / 733                                                                                                                          | 14560 / 36 / 687                                                                                                                | 15737 / 0 / 613                                                                                                                                              | 12331 / 318 / 725                                                                                                                       |
| Goodness-of-fit on $F^2$                         | 1.075                                                                                                                                      | 1.150                                                                                                                           | 1.059                                                                                                                                                        | 1.010                                                                                                                                   |
| Final $R$ indices [ $I > 2\sigma(I)$ ]           | $R_1 = 0.0350$<br>$wR_2 = 0.1033$                                                                                                          | $R_1 = 0.0775$<br>$wR_2 = 0.2602$                                                                                               | $R_1 = 0.0781$<br>$wR_2 = 0.2618$                                                                                                                            | $R_1 = 0.0251$<br>$wR_2 = 0.0842$                                                                                                       |
| $R$ indices (all data)                           | $R_1 = 0.0407$<br>$wR_2 = 0.1058$                                                                                                          | $R_1 = 0.1004$<br>$wR_2 = 0.2794$                                                                                               | $R_1 = 0.1002$<br>$wR_2 = 0.28384$                                                                                                                           | $R_1 = 0.0297$<br>$wR_2 = 0.0943$                                                                                                       |
| Largest diff. peak and hole (e Å <sup>-3</sup> ) | 3.682 and -2.487                                                                                                                           | 4.476 and -2.502                                                                                                                | 7.278 and -4.558                                                                                                                                             | 1.296 and -1.142                                                                                                                        |
| CCDC                                             | 1850271                                                                                                                                    | 1850269                                                                                                                         | 1850272                                                                                                                                                      | 1850270                                                                                                                                 |

**Table S2** Langmuir-Freundlich parameters for adsorption of C<sub>2</sub>H<sub>2</sub>, C<sub>2</sub>H<sub>4</sub>, C<sub>2</sub>H<sub>6</sub>, CO<sub>2</sub>, and CH<sub>4</sub> in **ZJNU-63**.

| Guest                         | $q_{\text{sat}}$<br>(mmol g <sup>-1</sup> ) | $b_0$<br>(kPa) <sup>-<math>\nu</math></sup> | $E$<br>(kJ mol <sup>-1</sup> ) | $\nu$   |
|-------------------------------|---------------------------------------------|---------------------------------------------|--------------------------------|---------|
| C <sub>2</sub> H <sub>2</sub> | 22.10211                                    | 2.59039×10 <sup>-7</sup>                    | 22.412                         | 0.79218 |
| C <sub>2</sub> H <sub>4</sub> | 7.95226                                     | 2.49709×10 <sup>-7</sup>                    | 22.198                         | 1       |
| C <sub>2</sub> H <sub>6</sub> | 6.53751                                     | 3.17898×10 <sup>-7</sup>                    | 23.129                         | 1       |
| CO <sub>2</sub>               | 106.97254                                   | 2.75326×10 <sup>-8</sup>                    | 19.444                         | 1       |
| CH <sub>4</sub>               | 5.48745                                     | 1.12506×10 <sup>-6</sup>                    | 14.623                         | 1       |
